# Supplementary material
Source: publisher site journal article supplement (https://www.kjim.org/upload/media/kjim-2018-133-suppl2.pdf)
Supplement: Supplementary file 1 [file kjim-2018-133-suppl2.pdf]

**Supplementary Table 2. Least squares mean differences (vs. placebo) in LDL-C and secondary lipid parameters in patients of alirocumab group in modified intent-to-treat population**

| Lipid parameter | % Change at week 24 from baseline |                     | Difference of % change compared to placebo group | 95% CI         | p value  |
|-----------------|-----------------------------------|---------------------|--------------------------------------------------|----------------|----------|
|                 | Placebo (n = 43)                  | Alirocumab (n = 40) |                                                  |                |          |
| LDL-C           | 11.1 ± 4.2                        | -67.3 ± 4.4         | -78.5 ± 6.1                                      | -90.6 to -66.3 | < 0.0001 |
| non-HDL-C       | 8.2 ± 3.1                         | -55.9 ± 3.2         | -64.1 ± 4.4                                      | -72.9 to -55.3 | < 0.0001 |
| HDL-C           | 8.1 ± 2.9                         | 16.9 ± 3.0          | 8.7 ± 4.2                                        | 0.4 to 17.1    | 0.0412   |
| Fasting TG      | -0.05 ± 4.9                       | -8.3 ± 5.0          | -8.3 ± 7.0                                       | -22.0 to 5.3   | 0.2298   |
| TC              | 7.1 ± 2.3                         | -35.9 ± 2.4         | -43.0 ± 3.3                                      | -49.7 to -36.4 | < 0.0001 |
| Lp(a)           | 5.3 ± 5.7                         | -37.0 ± 5.6         | -42.3 ± 8.0                                      | -58.0 to -26.6 | < 0.0001 |
| Apo A1          | 7.2 ± 2.1                         | 3.7 ± 2.2           | -3.5 ± 3.0                                       | -9.6 to 2.5    | 0.2482   |
| Apo B           | 7.9 ± 3.1                         | -50.4 ± 3.2         | -58.2 ± 4.5                                      | -67.2 to -49.2 | < 0.0001 |

Values are presented as mean ± SE.

LDL-C, low density lipoprotein cholesterol; CI, confidence interval; HDL-C, high density lipoprotein cholesterol; TG, triglyceride; TC, total cholesterol; Lp(a), lipoprotein(a); Apo A1, apolipoprotein A1; Apo B, apolipoprotein B.
